# Supplementary material for: G protein stoichiometry dictates biased agonism through distinct receptor-G protein partitioning
Source: PubMed Central journal article supplement (PMC5554226; doi:10.1038/s41598-017-07392-5), 2017-08-11
Supplement: 41598_2017_7392_MOESM1_ESM.pdf [file 41598_2017_7392_MOESM1_ESM.pdf]

# **G protein stoichiometry dictates biased agonism through distinct receptor-G protein partitioning**

Lauriane Onfroy<sup>1</sup>, Ségolène Galandrin<sup>1</sup>, Stéphanie M. Pontier<sup>2</sup>, Marie-Hélène Seguelas<sup>1</sup>, Du N'Guyen<sup>1</sup>, Jean-Michel Sénard<sup>1,3</sup>, Céline Galés<sup>1</sup>.

<sup>1</sup> Institut des Maladies Métaboliques et Cardiovasculaires, Institut National de la Santé et de la Recherche Médicale, U1048, Université de Toulouse, F-31432 Toulouse, France.

<sup>2</sup> Independent Researcher Ottawa, ON, Canada.

<sup>3</sup> Service de Pharmacologie Clinique, Centre Hospitalier Universitaire de Toulouse, Faculté de Médecine, Université de Toulouse, F-31000 Toulouse, France.

## **SUPPLEMENTARY FIGURES**

# Supplementary Figure 1

G protein activation

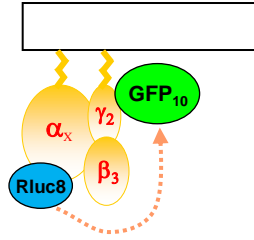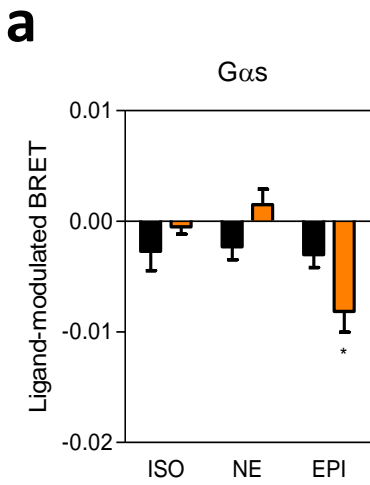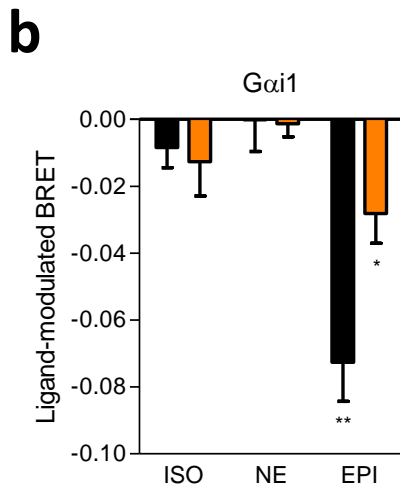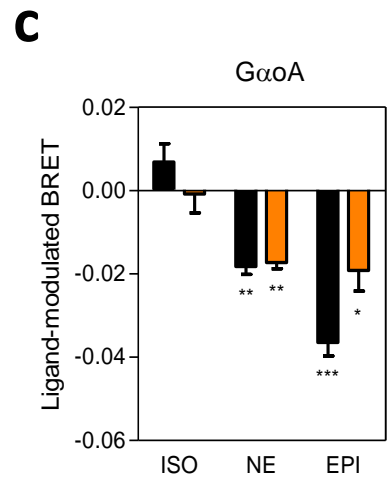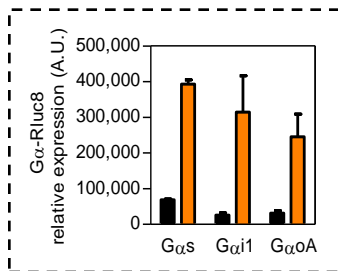

● Gα low    ● Gα high

## Supplementary Figure 2

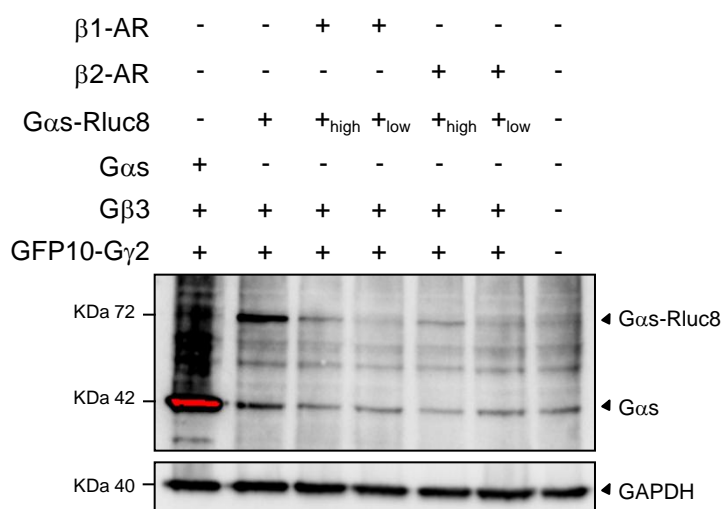

# Supplementary Figure 3

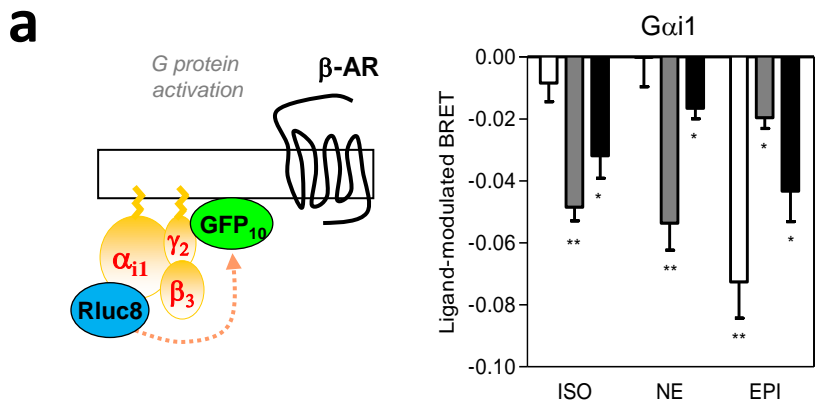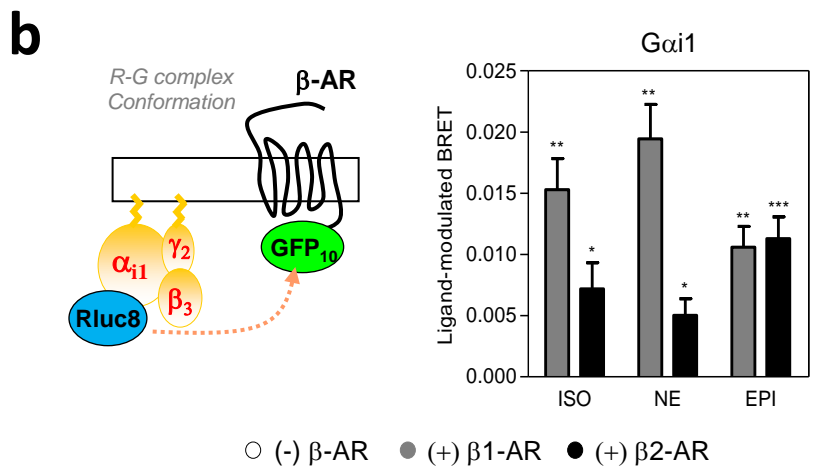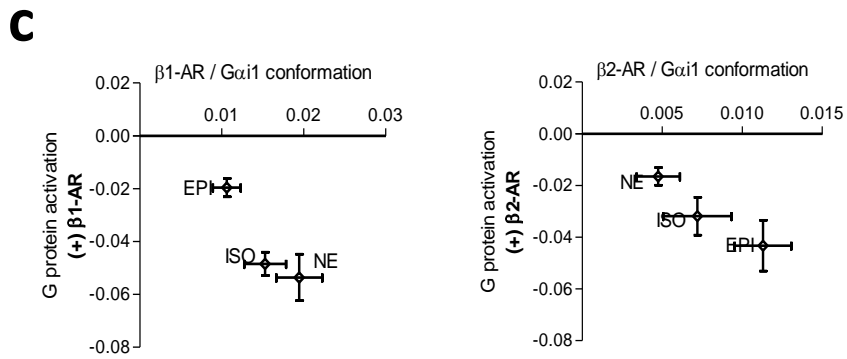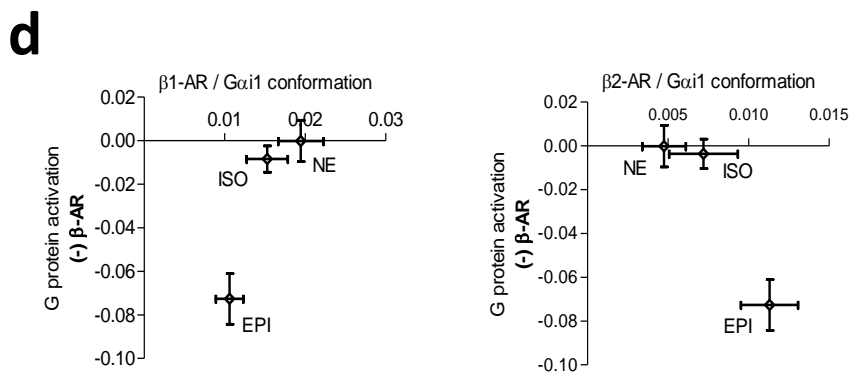

# Supplementary Figure 4

**a**

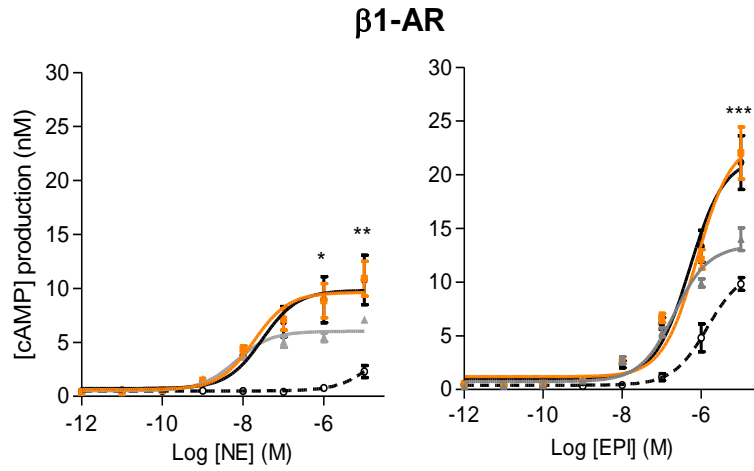

**b**

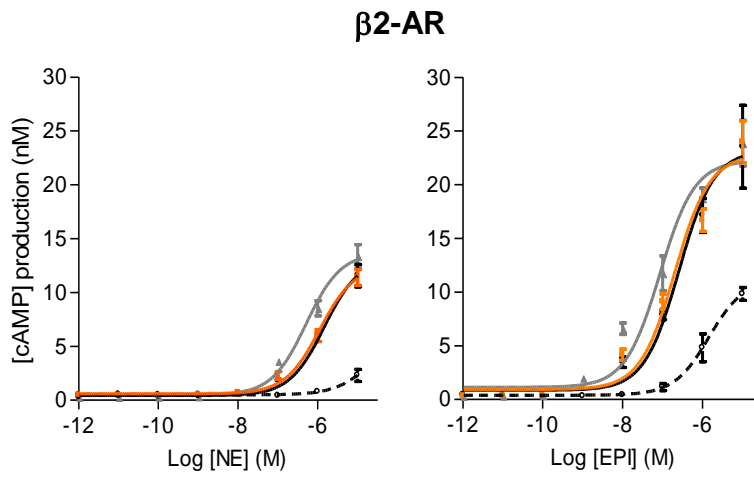

○ (-)  $\beta$ -AR (-)  $G\alpha_s$       ● (+)  $\beta$ -AR (+)  $G\alpha_s$  low  
 ● (+)  $\beta$ -AR (-)  $G\alpha_s$       ● (+)  $\beta$ -AR (+)  $G\alpha_s$  high

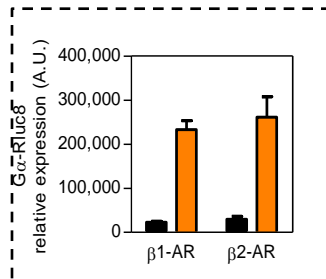

## Supplementary Figure 5

**a**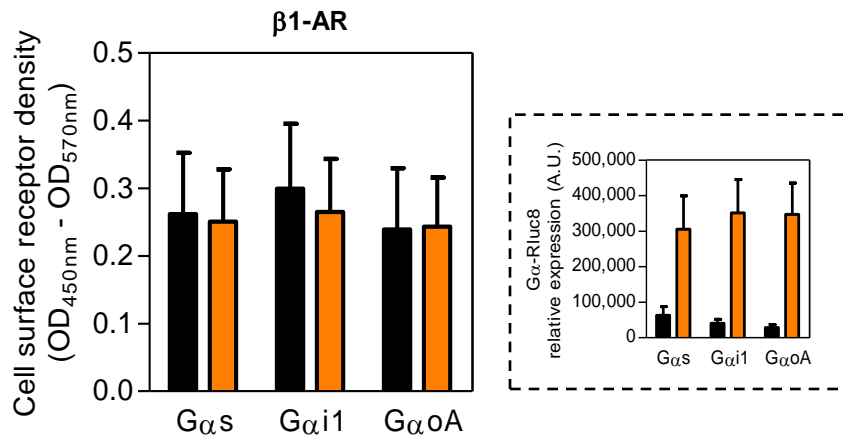**b**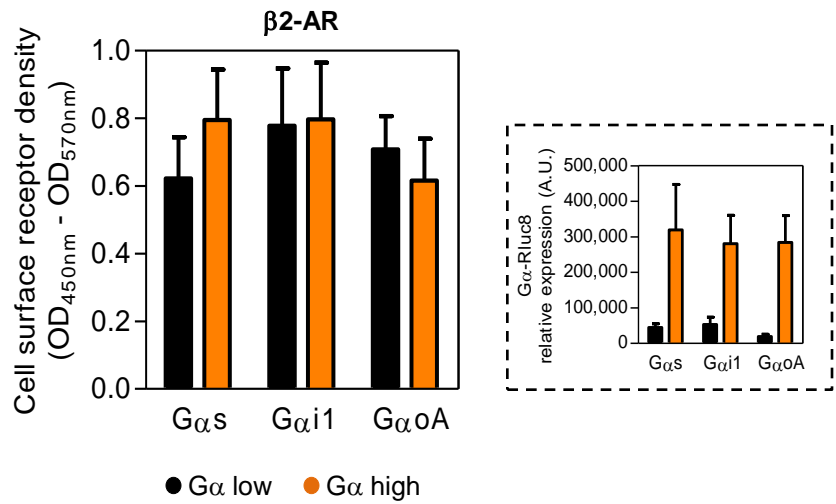

## Supplementary Figure 6

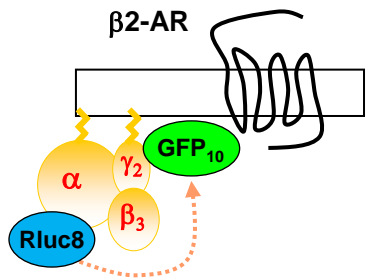**a**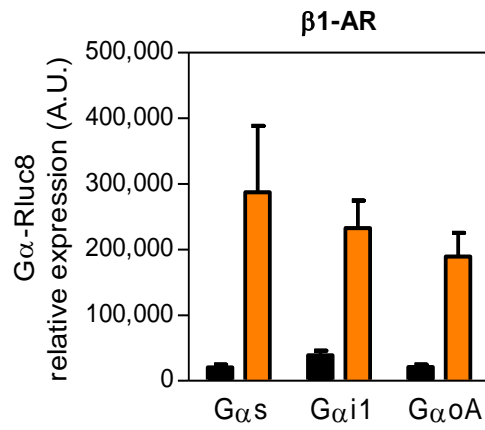**b**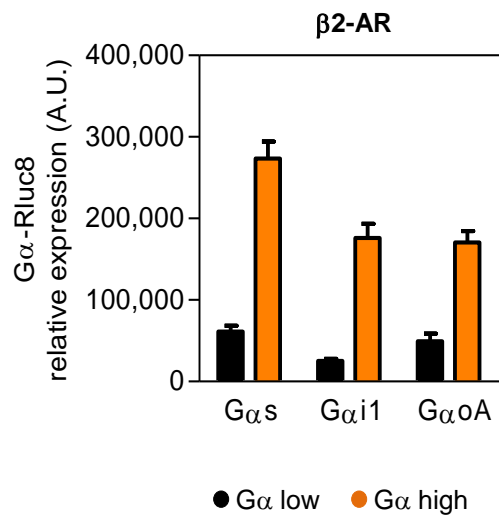



# Supplementary Figure 7

**a**

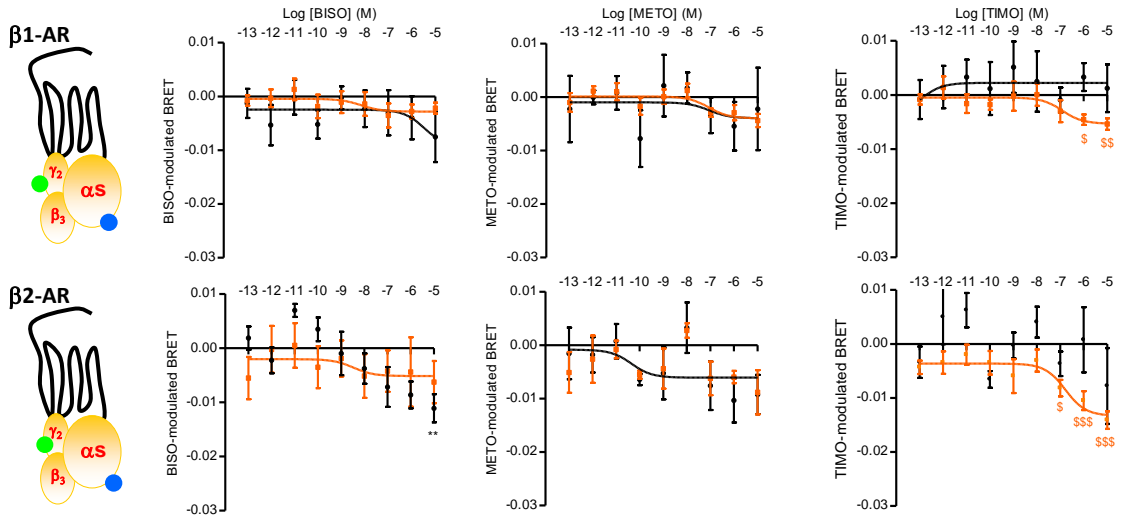

**b**

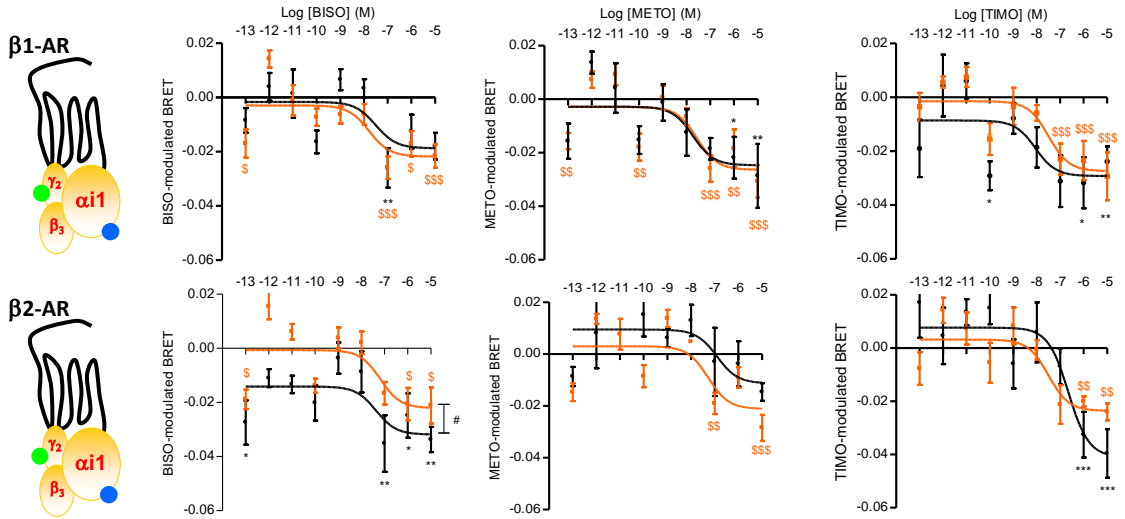

**c**

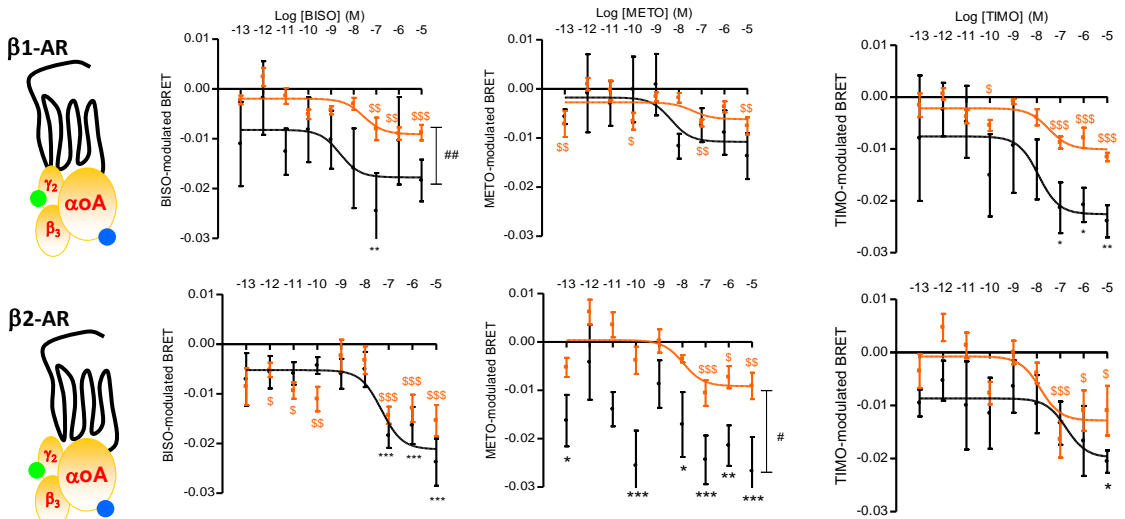

●  $\alpha$  low    ●  $\alpha$  high

# Supplementary Figure 8

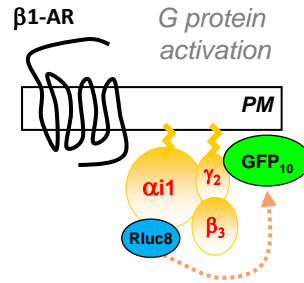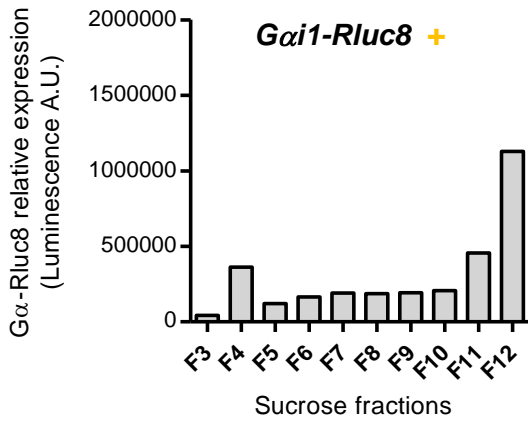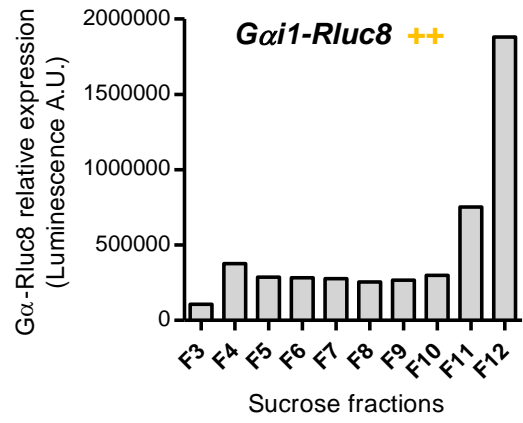

## Supplementary Figure 9

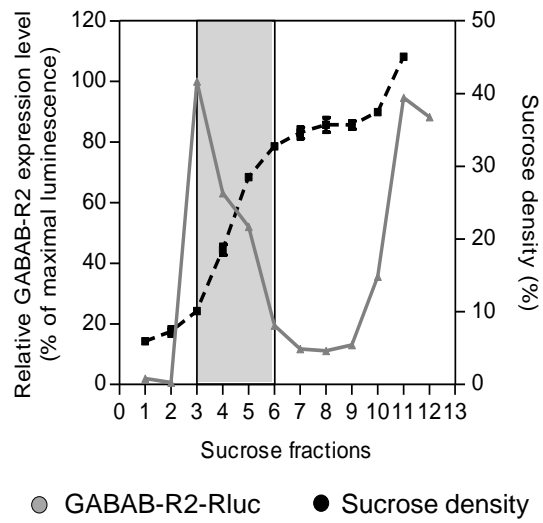

## **SUPPLEMENTARY TABLES**

## Supplementary Table 1

| Ligands               |                           | NE           |              | EPI           |              |
|-----------------------|---------------------------|--------------|--------------|---------------|--------------|
| (-) R<br>(-) G        | EC50                      | 1.63e-005    |              | 1.44e-006     |              |
|                       | pEC50 ± s.e.m.            | -4.78 ± 1.14 |              | -5.84 ± 0.10  |              |
|                       | E <sub>max</sub> ± s.e.m. | 5.25 ± 7.81  |              | 11.18 ± 0.704 |              |
| Receptor (R)          |                           | β1-AR        | β2-AR        | β1-AR         | β2-AR        |
| (+) R<br>(-) G        | EC50                      | 6.71e-009    | 5.09e-007    | 2.08e-007     | 8.53e-008    |
|                       | pEC50 ± s.e.m.            | -8.17 ± 0.13 | -6.29 ± 0.08 | -6.68 ± 0.10  | -7.07 ± 0.11 |
|                       | E <sub>max</sub> ± s.e.m. | 6.031 ± 0.24 | 13.70 ± 0.54 | 13.39 ± 0.56  | 22.25 ± 1.02 |
| (+) R<br>(+) Gas low  | EC50                      | 2.98e-008    | 1.45e-006    | 5.11e-007     | 2.57e-007    |
|                       | pEC50 ± s.e.m.            | -7.52 ± 0.23 | -5.84 ± 0.07 | -6.29 ± 0.11  | -6.59 ± 0.13 |
|                       | E <sub>max</sub> ± s.e.m. | 9.81 ± 0.76  | 13.15 ± 0.56 | 21.58 ± 1.20  | 23.18 ± 1.34 |
| (+) R<br>(+) Gas high | EC50                      | 1.85e-008    | 1.12e-006    | 7.85e-007     | 2.02e-007    |
|                       | pEC50 ± s.e.m.            | -7.73 ± 0.18 | -5.95 ± 0.07 | -6.10 ± 0.11  | -6.69 ± 0.09 |
|                       | E <sub>max</sub> ± s.e.m. | 9.63 ± 0.56  | 12.53 ± 0.5  | 23.17 ± 1.31  | 22.79 ± 0.90 |

## Supplementary Table 2

**β1-AR**

| Gαs  | Low       |                |                | High      |                |                | Low vs. High |       |
|------|-----------|----------------|----------------|-----------|----------------|----------------|--------------|-------|
|      | EC50      | pEC50 ± s.e.m. | Emax ± s.e.m.  | EC50      | pEC50 ± s.e.m. | Emax ± s.e.m.  | EC50         | Emax  |
| ISO  | 3.61e-008 | -7.44 ± 0.86   | -0.009 ± 0.001 | 3.02e-008 | -7.52 ± 0.38   | -0.009 ± 0.001 | ns           | ns    |
| NE   | 1.13e-008 | -7.94 ± 0.61   | -0.011 ± 0.001 | 1.25e-008 | -7.90 ± 0.28   | -0.008 ± 0.001 | ns           | 0.03* |
| EPI  | 3.10e-006 | -5.50 ± 0.53   | -0.014 ± 0.005 | 4.65e-008 | -7.33 ± 0.26   | -0.012 ± 0.001 | 0.01**       | ns    |
| Gαi1 | Low       |                |                | High      |                |                | Low vs. High |       |
|      | EC50      | pEC50 ± s.e.m. | Emax ± s.e.m.  | EC50      | pEC50 ± s.e.m. | Emax ± s.e.m.  | EC50         | Emax  |
| ISO  | 1.01e-007 | -6.99 ± 0.67   | -0.044 ± 0.007 | na        | na             | na             | ns           | ns    |
| NE   | 6.09e-008 | -7.21 ± 0.57   | -0.024 ± 0.005 | 5.27e-008 | -7.27 ± 0.33   | -0.039 ± 0.004 | ns           | ns    |
| EPI  | 5.84e-008 | -7.23 ± 0.77   | -0.030 ± 0.008 | na        | na             | na             | ns           | ns    |
| GαoA | Low       |                |                | High      |                |                | Low vs. High |       |
|      | EC50      | pEC50 ± s.e.m. | Emax ± s.e.m.  | EC50      | pEC50 ± s.e.m. | Emax ± s.e.m.  | EC50         | Emax  |
| ISO  | 6.17e-008 | -7.21 ± 0.15   | -0.058 ± 0.004 | 1.26e-007 | -6.9 ± 0.13    | -0.060 ± 0.003 | ns           | ns    |
| NE   | 2.93e-007 | -6.53 ± 0.14   | -0.074 ± 0.005 | 2.49e-007 | -6.60 ± 0.11   | -0.081 ± 0.004 | ns           | ns    |
| EPI  | 2.55e-006 | -5.59 ± 0.17   | -0.079 ± 0.01  | 1.28e-006 | -5.89 ± 0.13   | -0.072 ± 0.006 | ns           | ns    |

## Supplementary Table 3

**β2-AR**

| <b>Gαs</b>  | <b>Low</b>  |                       |                      | <b>High</b> |                       |                      | <b>Low vs. High</b> |             |
|-------------|-------------|-----------------------|----------------------|-------------|-----------------------|----------------------|---------------------|-------------|
|             | <b>EC50</b> | <b>pEC50 ± s.e.m.</b> | <b>Emax ± s.e.m.</b> | <b>EC50</b> | <b>pEC50 ± s.e.m.</b> | <b>Emax ± s.e.m.</b> | <b>EC50</b>         | <b>Emax</b> |
| <b>ISO</b>  | 2.12e-008   | -7.67 ± 0.48          | -0.017 ± 0.002       | 7.64e-010   | -9.11 ± 0.3295        | -0.023 ± 0.001       | 0.04*               | ns          |
| <b>NE</b>   | 8.03e-007   | -6.09 ± 0.51          | -0.018 ± 0.004       | 8.29e-008   | -7.08 ± 0.3462        | -0.022 ± 0.002       | ns                  | ns          |
| <b>EPI</b>  | 1.67e-009   | -8.77 ± 0.41          | -0.017 ± 0.002       | 8.96e-009   | -8.05 ± 0.2458        | -0.019 ± 0.001       | ns                  | ns          |
| <b>Gαi1</b> | <b>Low</b>  |                       |                      | <b>High</b> |                       |                      | <b>Low vs. High</b> |             |
|             | <b>EC50</b> | <b>pEC50 ± s.e.m.</b> | <b>Emax ± s.e.m.</b> | <b>EC50</b> | <b>pEC50 ± s.e.m.</b> | <b>Emax ± s.e.m.</b> | <b>EC50</b>         | <b>Emax</b> |
| <b>ISO</b>  | 1.61e-008   | -7.79 ± 0.55          | -0.057 ± 0.006       | 4.95e-008   | -7.30 ± 0.27          | -0.044 ± 0.005       | ns                  | ns          |
| <b>NE</b>   | 1.92e-007   | -6.71 ± 0.27          | -0.073 ± 0.008       | 6.49e-008   | -7.19 ± 0.37          | -0.064 ± 0.008       | ns                  | ns          |
| <b>EPI</b>  | 1.33e-007   | -6.87 ± 0.42          | -0.097 ± 0.01        | 5.83e-008   | -7.23 ± 0.29          | -0.063 ± 0.006       | ns                  | 0.04*       |
| <b>GαoA</b> | <b>Low</b>  |                       |                      | <b>High</b> |                       |                      | <b>Low vs. High</b> |             |
|             | <b>EC50</b> | <b>pEC50 ± s.e.m.</b> | <b>Emax ± s.e.m.</b> | <b>EC50</b> | <b>pEC50 ± s.e.m.</b> | <b>Emax ± s.e.m.</b> | <b>EC50</b>         | <b>Emax</b> |
| <b>ISO</b>  | 3.48e-007   | -6.46 ± 0.29          | -0.041 ± 0.004       | 1.22e-007   | -6.91 ± 0.25          | -0.026 ± 0.002       | ns                  | 0.01*       |
| <b>NE</b>   | 2.78e-007   | -6.55 ± 0.29          | -0.044 ± 0.005       | 5.34e-008   | -7.27 ± 0.34          | -0.028 ± 0.003       | ns                  | 0.03*       |
| <b>EPI</b>  | 2.03e-007   | -6.69 ± 0.21          | -0.044 ± 0.003       | 5.07e-008   | -7.29 ± 0.32          | -0.030 ± 0.003       | ns                  | 0.04*       |

## SUPPLEMENTARY FIGURE/TABLE LEGENDS

**Supplementary Figure 1.  $\beta$ 2-AR agonist maximal efficacy on endogenous  $\beta$ -receptor-mediated G protein activation.** a-c) BRET in HEK293T cells expressing low (back bars) and high (orange bars) expression levels  $G\alpha_s$ -Rluc8 (a),  $G\alpha_i1$ -Rluc8 (b) or  $G\alpha_oA$ -Rluc8 (c) in presence of GFP10-G $\gamma$ 2 and G $\beta$ 3 untagged subunits. Cells were stimulated or not for 1 min with 10  $\mu$ M of the indicated agonists. Results are expressed as the difference in BRET signals measured in presence and absence of ligand. Data represent the mean  $\pm$  s.e.m. of at least four independent experiments. The statistical significance between stimulated and unstimulated cells was assessed using paired Student's t-test (\* $P$ <0.05, \*\* $P$ <0.01, \*\*\* $P$ <0.001). *Inset:* Relative expression levels of  $G\alpha$ -Rluc8 proteins reflected by the Rluc8 luminescence measured in each experimental transfections.

**Supplementary Figure 2. Expression of the  $G\alpha_s$ -Rluc8 over-expressed protein.**  $G\alpha_s$  expression was analyzed by western-blot from HEK293T cells expressing untagged- $G\alpha_s$  or different levels of  $G\alpha_s$ -Rluc8 along with G $\beta$ 3 and GFP10-G $\gamma$ 2 in the presence or not of the  $\beta$ 1-AR or  $\beta$ 2-AR or the empty pcDNA3.1 vector (control) as indicated. GAPDH was analyzed as housekeeping protein. The blot is representative of two independent experiments.

**Supplementary Figure 3. Ligand efficacies parallels  $G\alpha_i1$  protein activation and conformational changes within  $\beta$ -AR/ $G\alpha_i1$  complexes.** BRET measuring a) G protein activation in HEK293T cells expressing low level of  $G\alpha_i1$ -Rluc8 in the presence of GFP10-G $\gamma$ 2 and G $\beta$ 3 untagged subunit in the presence of  $\beta$ 1-AR (gray bars) or  $\beta$ 2-AR (black bars). or, b) conformational changes of  $\beta$ -AR/ $G\alpha_i1$  complexes in HEK293T cells co-expressing  $\beta$ 1-AR-GFP10 (gray bars) or  $\beta$ 2-AR-GFP10 (black bars) receptors in the presence of low level of  $G\alpha_i1$ -Rluc8 along with untagged G $\gamma$ 2 and G $\beta$ 3 subunits. Cells were stimulated or not for 1 min with 10  $\mu$ M of the indicated agonists. Results are expressed as the difference in BRET signals measured in presence and absence of ligand. Data represent the mean  $\pm$  s.e.m. of at least four independent experiments. The statistical significance between stimulated and unstimulated cells was assessed using paired Student's t-test (\*  $P$ <0.05, \*\*  $P$ <0.01, \*\*\*  $P$ <0.001). c, d) Graphical illustration of the correlation between  $G\alpha_i1$  protein activation and  $\beta$ 2-AR/ $G\alpha_i1$  conformational changes in cells expressing (c) or not (d) the  $\beta$ 1-AR or  $\beta$ 2-AR receptors.



**Supplementary Figure 4. Concentration-response curves of cAMP production mediated by  $\beta$ -AR agonists.** **a, b)** Quantification of cAMP levels performed in HEK293T cells co-expressing or not  $\beta$ 1-AR (**a**) or  $\beta$ 2-AR (**b**) receptors in the presence or not of low (black circles) or high (orange circles) expression levels of  $G\alpha$ s-Rluc8 along with GFP10-G $\gamma$ 2 and G $\beta$ 3 subunits as in Fig. 3 and stimulated or not with various NE (left panels) or EPI (right panels) concentrations. The statistical significance between dose-response curves was assessed using two-way ANOVA followed by a Bonferroni posttest (\* $P$ <0.05, \*\* $P$ <0.01). *Inset:* Relative expression levels of  $G\alpha$ -Rluc8 proteins reflected by the Rluc8 luminescence measured in each experimental transfection.

**Supplementary Figure 5. Quantification of HA- $\beta$ -AR cell surface expression by ELISA.** **a, b)** ELISA experiments were performed on non-permeabilized HEK293T cells co-expressing HA- $\beta$ 1-AR (**a**) or HA- $\beta$ 2-AR (**b**) receptors and low (black) or high (orange) expression levels of  $G\alpha$ s-Rluc8,  $G\alpha$ i1-Rluc8 or  $G\alpha$ oA-Rluc8 in presence of GFP10-G $\gamma$ 2 and G $\beta$ 3 untagged subunit. Cell surface expression of  $\beta$ -ARs was quantified by ELISA using an anti-HA antibody. *Insets:* Each experimental transfection was calibrated and controlled for  $G\alpha$ -Rluc8 relative expression levels by measuring the total emission level of Rluc8 luminescence. Data represent the mean  $\pm$  s.e.m. of three independent experiments. The statistical significance of the difference in cell surface receptor density between low and high  $G\alpha$ -Rluc8 expression level was assessed using unpaired Student's t-test.

**Supplementary Figure 6. Relative expression level of  $G\alpha$  subunits in dose-response experiments.** **a-b)** Relative expression levels of  $G\alpha$ -Rluc8 subunits reflected by the Rluc8 luminescence measured at basal state from **a, b)** HEK293T cells co-expressing HA- $\beta$ 1-AR (**a**) or HA- $\beta$ 2-AR (**b**) in the presence of low (black bars) or high (orange bars)  $G\alpha$ s-Rluc8,  $G\alpha$ i1-Rluc8 or  $G\alpha$ oA-Rluc8 along with GFP10-G $\gamma$ 2 and G $\beta$ 3 untagged subunit as shown in Fig. 3

**Supplementary Figure 7. Influence of the  $G\alpha$  subunit expression level on the concentration-response curves of  $\beta$ -AR blockers-mediated G protein activation.** **a-c)** BRET in HEK293T cells co-expressing HA- $\beta$ 1-AR (upper panels) or HA- $\beta$ 2-AR (lower panels) receptors and low (black) or high (orange) expression levels of  $G\alpha$ s-Rluc8 (**a**),  $G\alpha$ i1-Rluc8 (**b**) or  $G\alpha$ oA-Rluc8 (**c**) in presence of fixed GFP10-G $\gamma$ 2 and G $\beta$ 3 untagged subunits.

Cells were stimulated or not for 1 min with increasing concentrations of the indicated  $\beta$ -antagonists (Bisoprolol, BISO; Metoprolol, METO; Timolol, TIMO). Results are expressed as the difference in BRET signals measured in presence and absence of ligand. Data represent the mean  $\pm$  s.e.m. of at least four independent experiments. The statistical significance between unstimulated cells and cells stimulated with the different ligand concentrations in low (\*) and high (\$)  $G\alpha$ -Rluc8 conditions was assessed using one-way ANOVA followed by a Dunnett's multiple comparison test (\*  $P < 0.05$ , \*\*  $P < 0.01$ , \*\*\*  $P < 0.001$ ). The statistical significance between low and high dose-response curves was assessed using two-way ANOVA followed by a Bonferroni post-test (# $P < 0.05$ , ## $P < 0.01$ ).

**Supplementary Figure 8. Relative expression level of  $G\alpha i1$  subunit in raft sucrose gradients.** Relative expression levels of  $G\alpha$ -Rluc8 subunits reflected by the Rluc8 luminescence measured in each sucrose fractions from HEK293T cells co-expressing HA- $\beta 1$ -AR in the presence of two different high concentration  $G\alpha i1$ -Rluc8 along with GFP10- $G\gamma 2$  and  $G\beta 3$  untagged subunit.

**Supplementary Figure 9. Membrane compartmentalization of the GABAB-R2 receptor.** Sucrose gradient fractionation on HEK293T cells expressing the GABAB-R2-Rluc receptor. Results are expressed as the percentage of the total luminescence measured in each gradient. Grey box highlights raft nano-domains enriched fractions. Sucrose density of each fractions was quantified using a refractometer.

**Supplementary Table 1. Potencies (EC50) and maximal efficacies (Emax) of Norepinephrine (NE) and Epinephrine (EPI) on cAMP production in HEK293T cells.** Data were obtained from experiments shown in Supplementary Fig. 4 and represent the mean of EC50, pEC50  $\pm$  s.e.m. and Emax  $\pm$  s.e.m..

**Supplementary Table 2. Potencies (EC50) and maximal efficacies (Emax) of  $\beta$ -AR agonists on  $\beta 1$ -AR-mediated  $G\alpha s\beta 3\gamma 2$ ,  $G\alpha i1\beta 3\gamma 2$  and  $G\alpha oA\beta 3\gamma 2$  activation in HEK293T cells.** Data were obtained from experiments shown in Fig. 3 and represent the mean of EC50, pEC50  $\pm$  s.e.m. and Emax  $\pm$  s.e.m. The statistical significance between low and high EC50 and Emax was assessed using unpaired Student's t-test (\* $P < 0.05$ , \*\* $P < 0.01$ , ns: not significant, na: not available).

**Supplementary Table 3. Potencies (EC50) and maximal efficacies (Emax) of  $\beta$ -AR ligands on  $\beta$ 2-AR-mediated G $\alpha$ s $\beta$ 3 $\gamma$ 2, G $\alpha$ i1 $\beta$ 3 $\gamma$ 2 and G $\alpha$ oA $\beta$ 3 $\gamma$ 2 activation in HEK293T cells.** Results were obtained from experiments shown in Fig. 3 and represent the mean of EC50, pEC50  $\pm$  s.e.m. and Emax  $\pm$  s.e.m. The statistical significance between low and high EC50 and Emax was assessed using unpaired Student's t-test (\* $P$ <0.05, ns: not significant).
